# Supplementary material for: Assembling Ultrafine SnO2 Nanoparticles on MIL-101(Cr) Octahedrons for Efficient Fuel Photocatalytic Denitrification
Source: MDPI journal article supplement (doi:10.3390/molecules26247566), 2021-12-14
Supplement: s1 [file s1]

## Supporting Information

### Assembling ultrafine SnO<sub>2</sub> nanoparticles on MIL-101(Cr) octahedrons for efficient fuel photocatalytic denitrification

Ruowen Liang<sup>a b</sup>, Shihui Wang<sup>c</sup>, Yi Lu<sup>c</sup>, Guiyang Yan<sup>a b d</sup>, Zhoujun He<sup>a b</sup>,

Yuzhou Xia<sup>\* a b</sup>, Zhiyu Liang<sup>\* a b</sup>, Ling Wu<sup>\* c</sup>,

<sup>a</sup> Department of chemistry, Fujian province university key laboratory of green energy and environment catalysis, Ningde Normal University, Ningde 352100, P. R. China

<sup>b</sup> State key laboratory of photocatalysis on energy and environment, Ningde Normal University, Ningde 352100, P. R. China

<sup>c</sup> State key laboratory of photocatalysis on energy and environment, Fuzhou University, Fuzhou 350002, P. R. China

<sup>d</sup> Xiamen Ocean Vocational College, Xiamen 361000, P. R. China

\* Corresponding author: Dr. Yuzhou Xia

Tel: +86-593-2965018; E-mail: yzxia@ndnu.edu.cn

\* Corresponding author: Prof. Zhiyu Liang

Tel: +86-593- 0593-2954127; E-mail: lzyfjnu@yeah.net

\* Corresponding author: Prof. Ling Wu

Tel: +86-591-83779105; E-mail: wuling@fzu.edu.cn

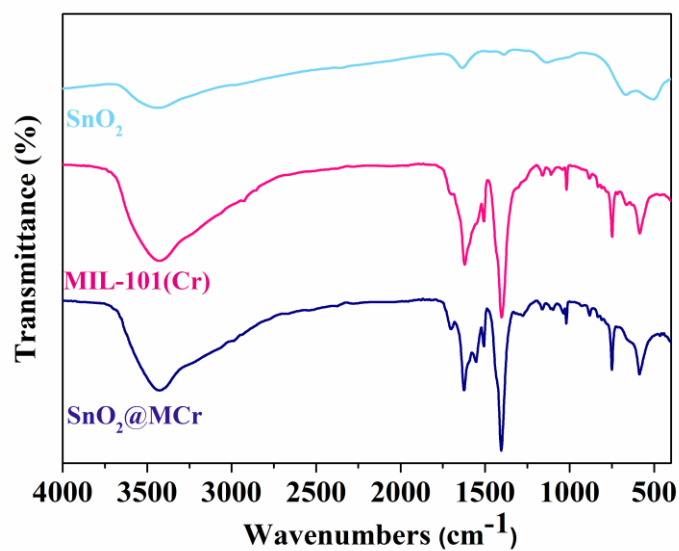

**Figure S1.** FTIR patterns of MIL-101(Cr), SnO<sub>2</sub> and 20% SnO<sub>2</sub>@MCR.

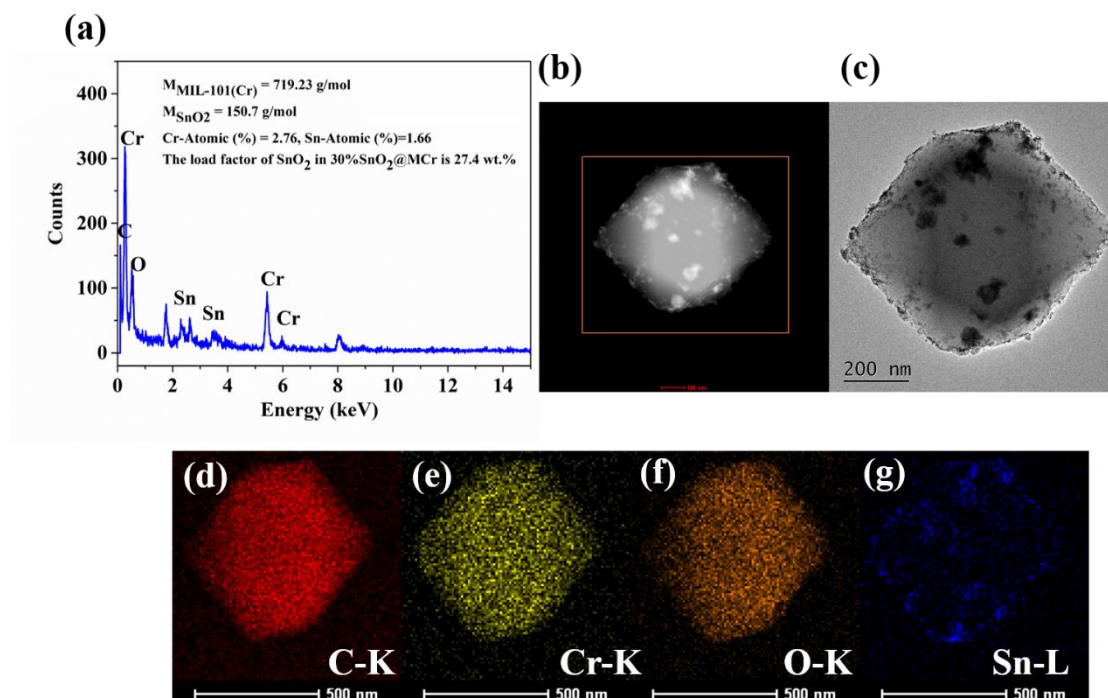

**Figure S2.** (a) EDS spectrum, (b-g) EDS elemental mappings for the sample of 20% SnO<sub>2</sub>@MCR.

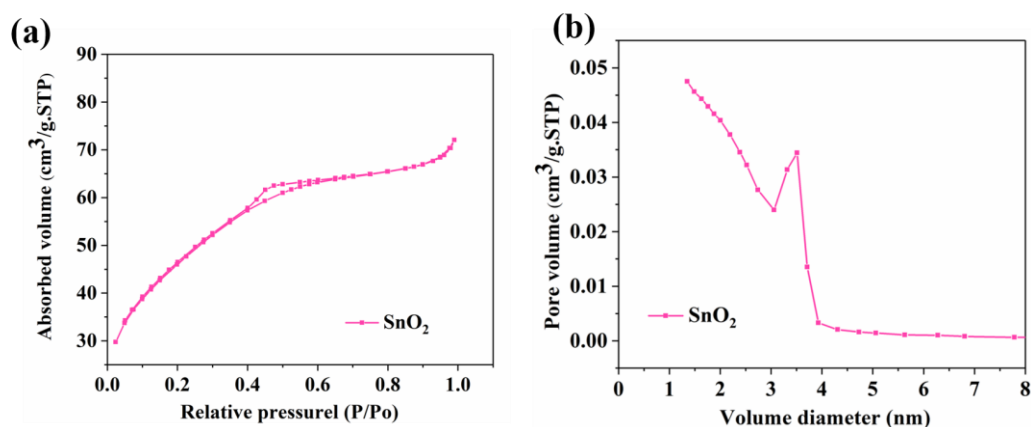

**Figure S3.** (a) Nitrogen sorption isotherms, (b) pore size distribution of SnO<sub>2</sub>.

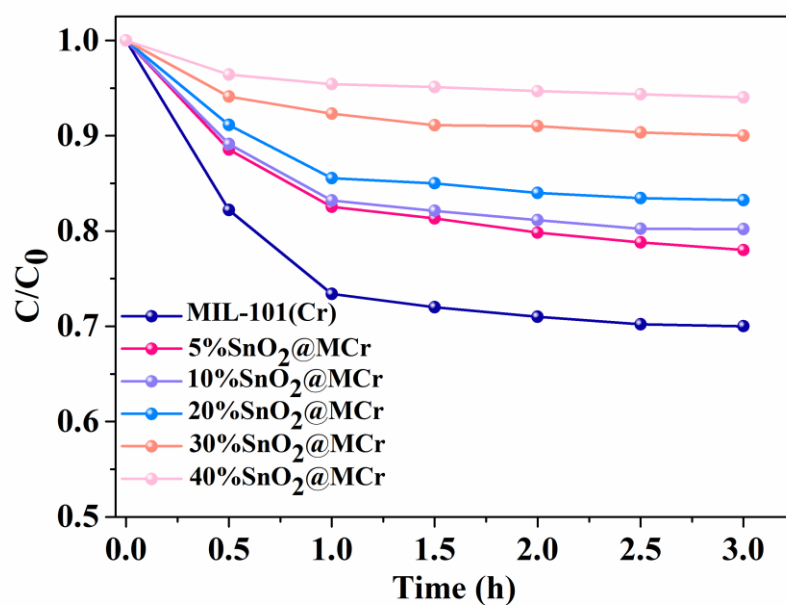

**Figure S4.** Adsorption capacity of SnO<sub>2</sub>@MCR towards pyridine. Reaction conditions: 25 mg of photocatalyst; 50 mL of 100  $\mu$ g/g pyridine/octane solution.

(a)

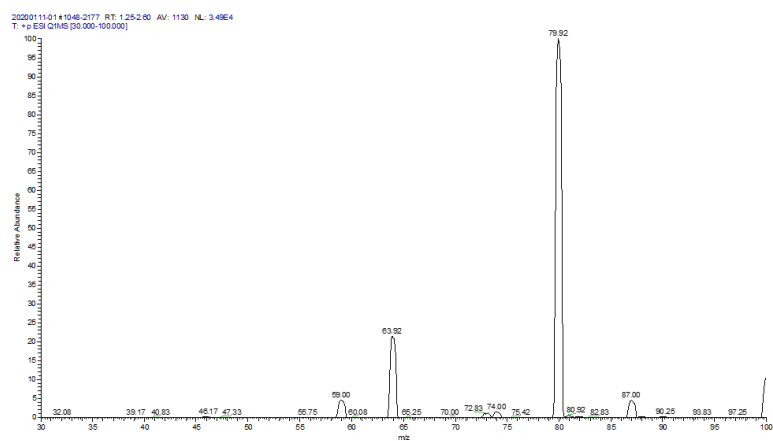

0 h

(b)

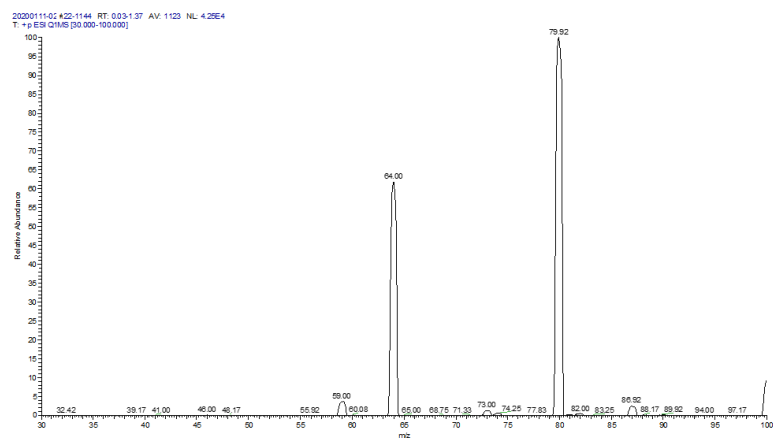

2 h

(c)

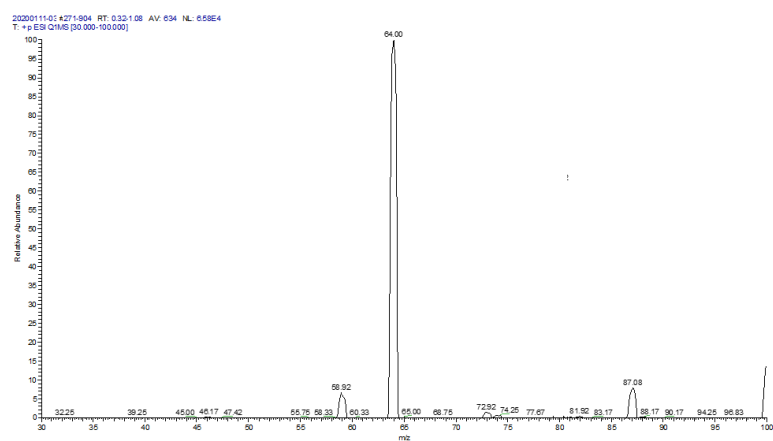

4 h

**Figure S5.** HPLC-MS spectrogram of pyridine degradation over 20%SnO<sub>2</sub>@MCr composites at different reaction times: (a) 0 h, (b) 2.0 h, (c) 4.0 h.
